# Supplementary material for: FXR induces SOCS3 and suppresses hepatocellular carcinoma
Source: PubMed Central journal article supplement (PMC4741476; doi:10.18632/oncotarget.5314), 2015-09-21
Supplement: oncotarget-06-34606-s001.pdf [file oncotarget-06-34606-s001.pdf]

## SUPPLEMENTARY FIGURE

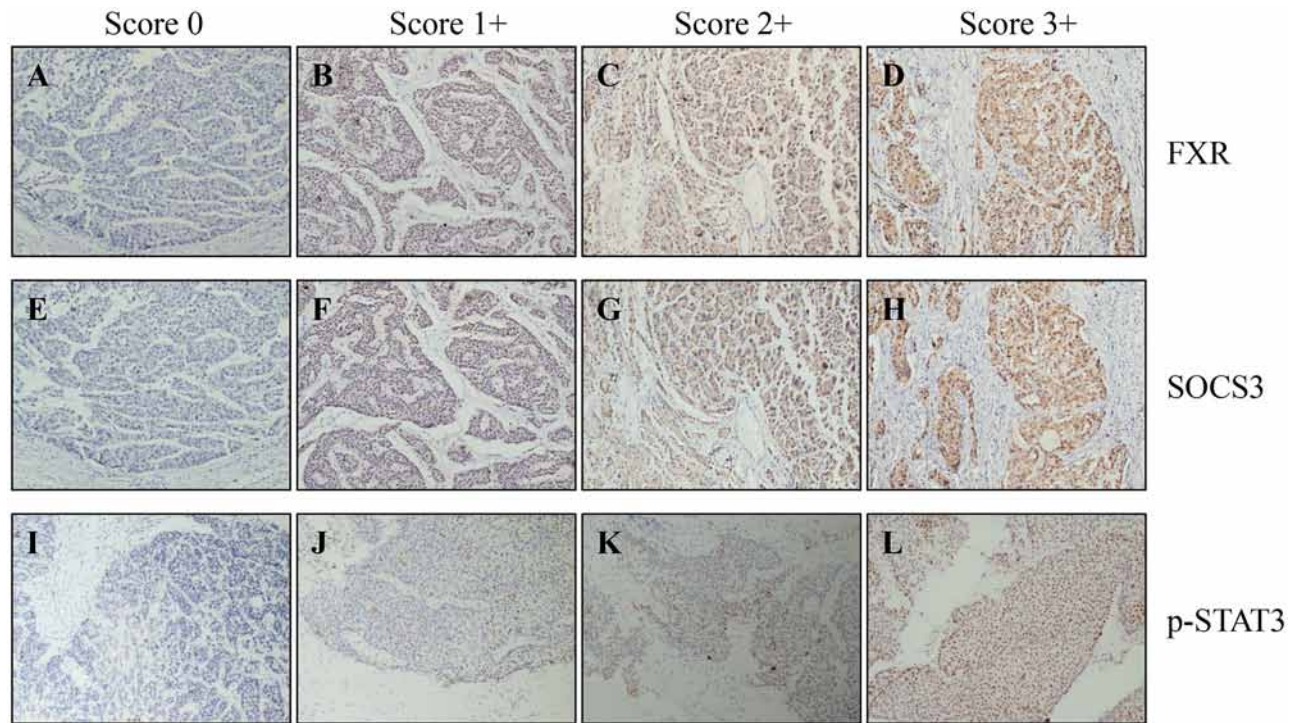

**Supplementary Figure S1: Scoring systems for immunohistochemical staining.** Scores 0–3+ represent no, weak, moderate and strong expression, respectively. **A–D.** Representative immunohistochemical stainings for FXR in HCC tumoral tissues. **E–H.** Representative immunohistochemical stainings for SOCS3 in HCC tumoral tissues. **I–L.** Representative immunohistochemical stainings for phosphorylated STAT3 (p-STAT3) in HCC tumoral tissues.
